# Supplementary material
Source: PubMed Central journal article supplement (PMC3926660)

### General Population

### Without CVD

OR/HR [95%CI]

OR/HR [95%CI]

CAC > 10  
(OR)

1.4 [1.1-1.8]

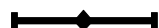

1.3 [1.0-1.8]

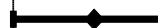

CAC > 100  
(OR)

1.7 [1.3-2.4]

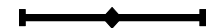

1.5 [1.0-2.2]

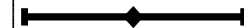

CV death  
(HR)

1.8 [1.1-3.2]

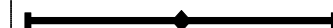

1.4 [0.6-2.9]

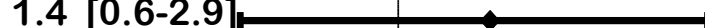

Total death  
(HR)

2.4 [1.7-3.4]

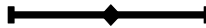

2.3 [1.6-3.4]

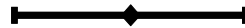

1

5

1

5

Supplement: NIHMS456635-supplement-Supp_Figure_1.pdf [file NIHMS456635-supplement-Supp_Figure_1.pdf]

**Risk Factors**      **Wald  $\chi^2$**       **Hazard ratio**

---

|             |      |               |
|-------------|------|---------------|
| Log GDF-15  | 25.0 | 1.6 [1.3-1.9] |
| LV mass/BSA | 11.2 | 1.2 [1.1-.4]  |
| Men         | 7.5  | 1.8 [1.2-2.9] |
| Age         | 7.9  | 1.4 [1.1-1.8] |
| Black       | 6.3  | 2.0 [1.2-3.4] |
| Diabetes    | 5.6  | 1.8 [1.1-2.8] |
| Smoking     | 4.3  | 1.5 [1.0-2.3] |

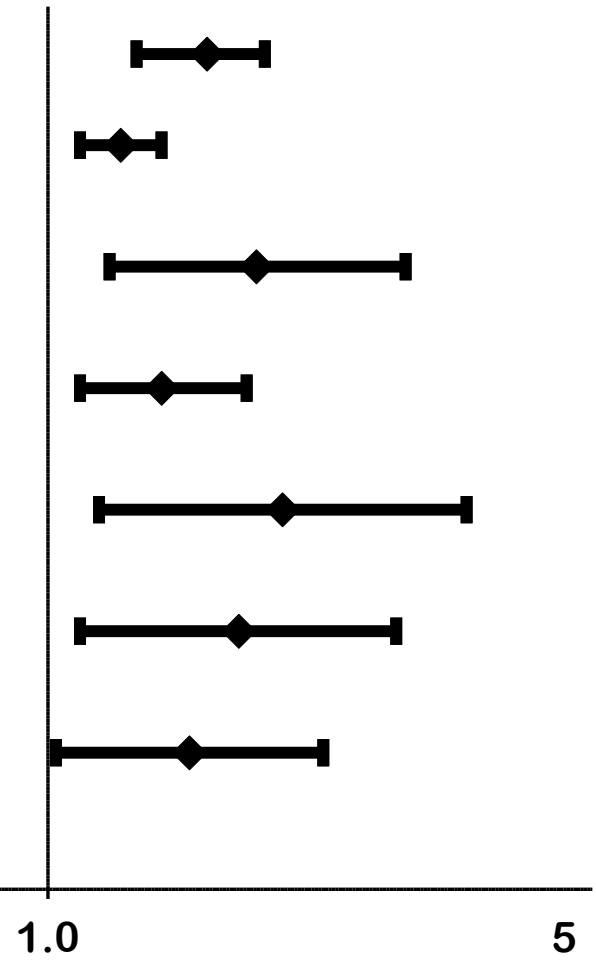

Supplement: NIHMS456635-supplement-Supp_Figure_2.pdf [file NIHMS456635-supplement-Supp_Figure_2.pdf]
